# Supplementary material for: Programmed death-ligand 1 (PD-L1) expression in tumour cell and tumour infiltrating lymphocytes of HER2-positive breast cancer and its prognostic value
Source: PubMed Central journal article supplement (PMC5601941; doi:10.1038/s41598-017-11905-7), 2017-09-15

**Programmed death-ligand 1 (PD-L1) expression in tumour cell and tumour infiltrating lymphocytes of HER2-positive breast cancer and its prognostic value**

Ahrong Kim, MD, PhD<sup>1</sup>, So Jeong Lee, MD<sup>1</sup>, Young-Keum Kim, MD<sup>1</sup>, Won-Young Park, MD<sup>1</sup>, Do Youn Park, MD, PhD<sup>1</sup>, Jee Yeon Kim, MD, PhD<sup>2</sup>, Chang Hun Lee, MD, PhD<sup>1</sup>, Gyungyub Gong, MD, PhD<sup>3</sup>, Gi Young Huh, MD, PhD<sup>1</sup>, Kyung Un Choi, MD, PhD<sup>1\*</sup>

Author Affiliations:

<sup>1</sup>Department of Pathology, BioMedical Research Institute, Pusan National University Hospital, Pusan, Korea

<sup>2</sup>Department of Pathology, Pusan National University Yangsan Hospital, Yangsan, Korea

<sup>3</sup>Department of Pathology, Asan Medical Center, University of Ulsan College of Medicine, Seoul, Korea

**Supplementary Table 1.** Basic data for 167 HER2-positive breast cancers

| Characteristic                    | Number (%) <sup>*</sup>  |
|-----------------------------------|--------------------------|
| Age, mean $\pm$ SD <sup>**</sup>  | 52.59 $\pm$ 10.126 years |
| Size, mean $\pm$ SD <sup>**</sup> | 3.213 $\pm$ 1.773 cm     |
| Side                              |                          |
| Left                              | 93 cases (55.7)          |
| Right                             | 74 cases (44.3)          |
| Histologic grade                  |                          |
| Grade 1, 2                        | 62 (37.1)                |
| Grade 3                           | 105 (62.9)               |
| Nuclear grade                     |                          |
| Grade 1, 2                        | 29 (17.4)                |
| Grade 3                           | 138 (82.6)               |
| Necrosis                          |                          |
| Absent                            | 57 (34.1)                |
| Present                           | 110 (65.9)               |
| Lymphovascular invasion           |                          |
| Absent                            | 90 (53.9)                |
| Present                           | 77 (46.1)                |
| Lymph node metastasis             |                          |
| Absent                            | 78 (46.7)                |
| Present                           | 89 (53.3)                |
| Stage                             |                          |
| Early (stage I, II)               | 126 (75.4)               |
| Advanced (stage III, IV)          | 41 (24.6)                |
| HR expression                     |                          |
| Positive                          | 89 (53.3)                |
| Negative                          | 78 (46.7)                |
| TILs level                        |                          |
| $\leq$ 10%                        | 61 (36.5)                |
| 20-60%                            | 74 (44.3)                |
| >60%                              | 32 (19.2)                |
| TLSs around DCIS                  |                          |
| Low                               | 102 (61.1)               |
| High                              | 65 (38.9)                |
| TLSs around invasive component    |                          |
| Low                               | 109 (65.3)               |
| High                              | 58 (34.7)                |

\*except for age and size

<sup>\*\*</sup>SD, standard deviation

**Supplementary Table 2.** PD-L1 expression and TILs level in total 167 HER2-positive breast cancers

| Characteristic                                           | Number (%)   |
|----------------------------------------------------------|--------------|
| PD-L1 expression in tumour cells                         |              |
| Immunoscore, mean±SD*                                    | 7.03±20.853  |
| Negative by Allred system                                | 86 (51.5)    |
| Positive by Allred system                                | 81 (48.5)    |
| Immunoscore of PD-L1 in TILs                             |              |
| Immunoscore, mean±SD                                     | 15.38±23.135 |
| Low                                                      | 116 (69.5)   |
| High                                                     | 51 (30.5)    |
| Total immunoscore of PD-L1 in both tumour cells and TILs |              |
| Immunoscore, mean±SD                                     | 22.41±35.921 |
| Low                                                      | 114 (68.3)   |
| High                                                     | 53 (31.7)    |
| Tumour type according to Teng's classification           |              |
| Type I                                                   | 28 (16.8)    |
| Type II                                                  | 82 (49.1)    |
| Type III                                                 | 53 (31.7)    |
| Type IV                                                  | 4 (2.4)      |

\*SD, standard deviation

**Supplementary Table 3.** Correlation of PD-L1 expression in tumour cells and TILs\*

|                                | PD-L1 expression in tumour cells |              | p-value |
|--------------------------------|----------------------------------|--------------|---------|
|                                | by Allred scoring system         |              |         |
|                                | Negative                         | Positive     |         |
|                                | (Number (%))                     | (Number (%)) |         |
| PD-L1 expression level in TILs |                                  |              | <0.001  |
| Low                            | 78 (90.7)                        | 38 (46.9)    |         |
| High                           | 8 (9.3)                          | 43 (53.1)    |         |

\*The Pearson's Chi-square test was used.

**Supplementary Table 4.** Disease-free survival based on various clinicopathologic parameters in HR-/HER2+ breast cancers\*

|                         | Univariate analysis |                |                 | Multivariate analysis |              |                 |
|-------------------------|---------------------|----------------|-----------------|-----------------------|--------------|-----------------|
|                         | HR**                | 95% CI***      | <i>p</i> -value | HR                    | 95% CI       | <i>p</i> -value |
| Stage (I,II vs III, IV) | 15.453              | 3.370-70.849   | <i>P</i> <0.001 | 9.760                 | 2.152-44.263 | <i>P</i> =0.013 |
| T stage (1,2 vs 3,4)    | 6.091               | 1.955-18.979   | <i>P</i> =0.002 | 1.626                 | 0.566-4.671  | <i>P</i> =0.449 |
| Lymph node metastasis   | 63.050              | 0.605-6570.270 | <i>P</i> =0.080 |                       |              |                 |
| Lymphovascular invasion | 6.774               | 1.482-30.956   | <i>P</i> =0.014 | 1.692                 | 0.395-7.245  | <i>P</i> =0.552 |
| TILs (0-60% vs >60%)    | 0.027               | 0.000-4.536    | <i>P</i> =0.167 |                       |              |                 |
| PD-L1                   | 0.277               | 0.075-1.022    | <i>P</i> =0.054 | 0.336                 | 0.105-1.076  | <i>P</i> =0.123 |

\*Cox proportional hazard regression model was used.

\*\*HR, hazard ratio

\*\*\*CI, confidence interval

**Supplementary Figure 1.** Western blot analysis of 4 fresh tissue samples with HER2-positive breast cancers

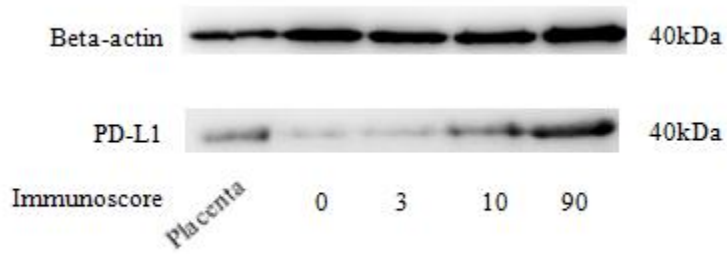

**Supplementary Figure 2.** Overall survival and disease-free survival in 167 HER2-positive breast cancers (A) Overall survival according to PD-L1 expression in tumour cells (B) Disease-free survival according to PD-L1 expression in tumour cells (C) Overall survival according to level of PD-L1 immunoscore in TILs (D) Disease-free survival according to level of PD-L1 immunoscore in TILs (E) Overall survival according to level of total PD-L1 immunoscore (F) Disease-free survival according to level of total PD-L1 immunoscore (G) Overall survival according to tumour types (H) Disease-free survival according to tumour types

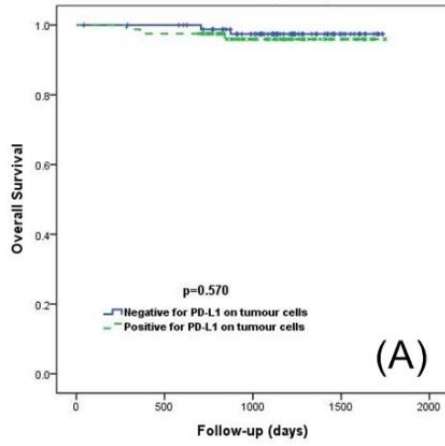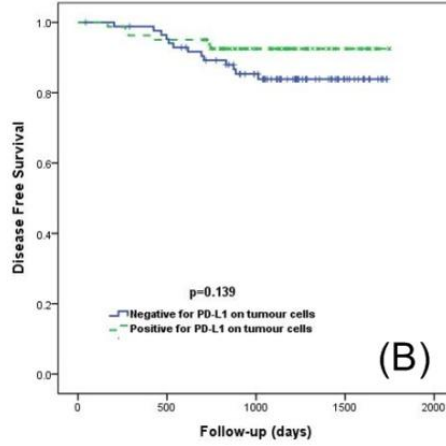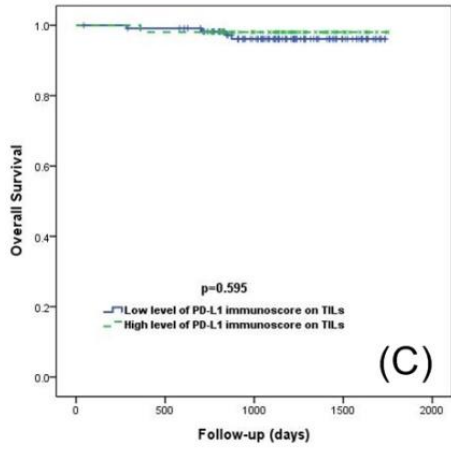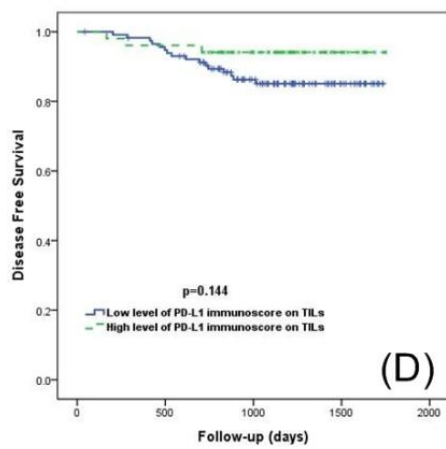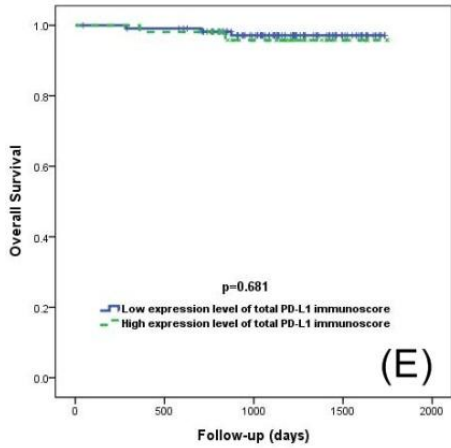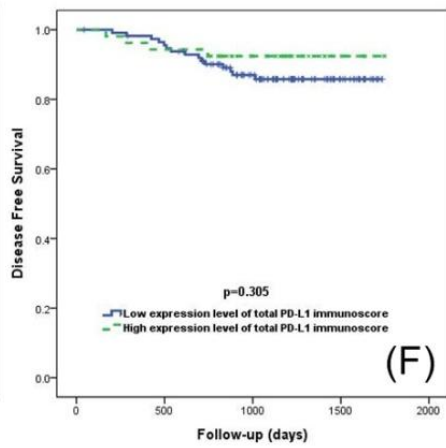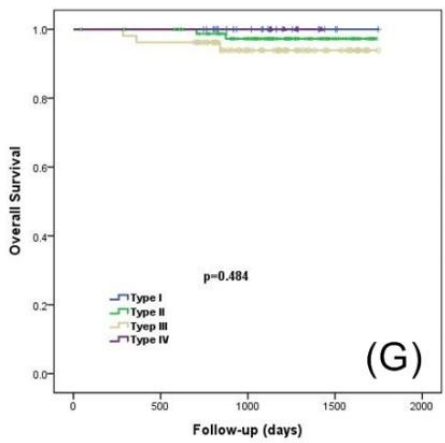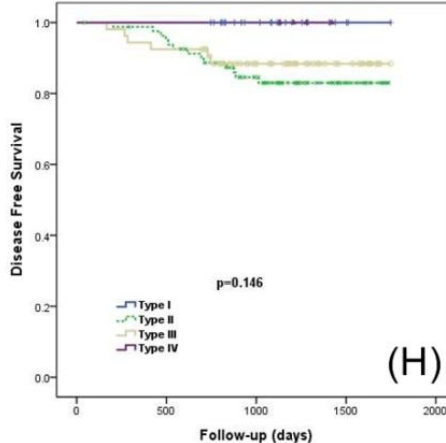



**Supplementary Figure 3.** Overall survival and disease-free survival in HR+/HER2+ breast cancers (A) Overall survival according to PD-L1 expression in tumour cells (B) Disease-free survival according to PD-L1 expression in tumour cells (C) Overall survival according to level of PD-L1 immunoscore in TILs (D) Disease-free survival according to level of PD-L1 immunoscore in TILs (E) Overall survival according to level of total PD-L1 immunoscore (F) Disease-free survival according to level of total PD-L1 immunoscore (G) Overall survival according to tumour types (H) Disease-free survival according to tumour types

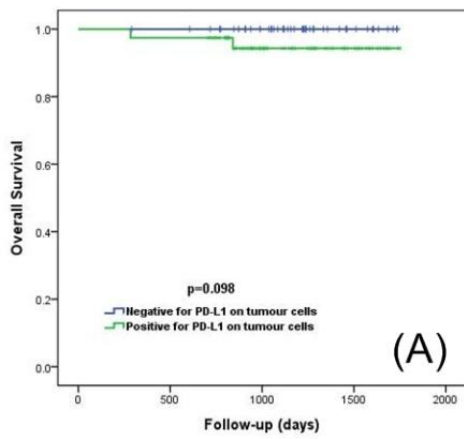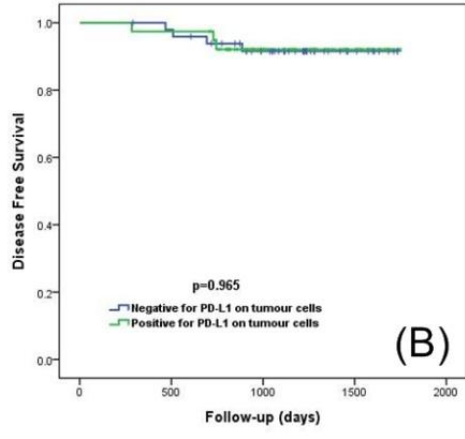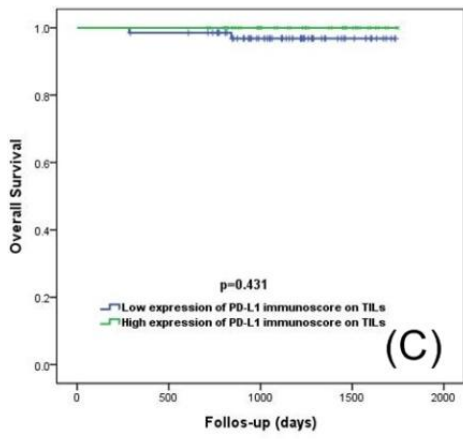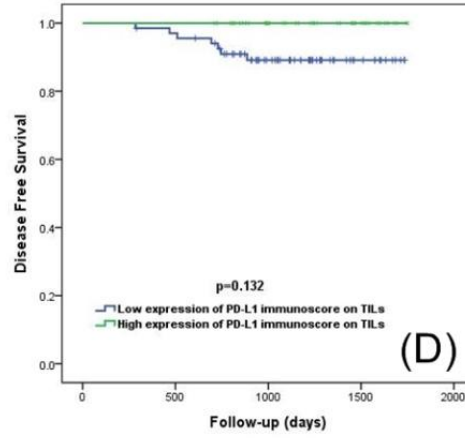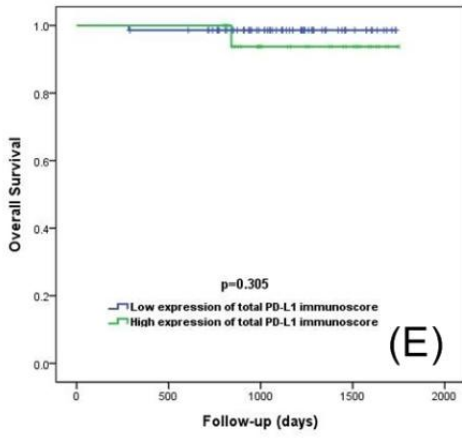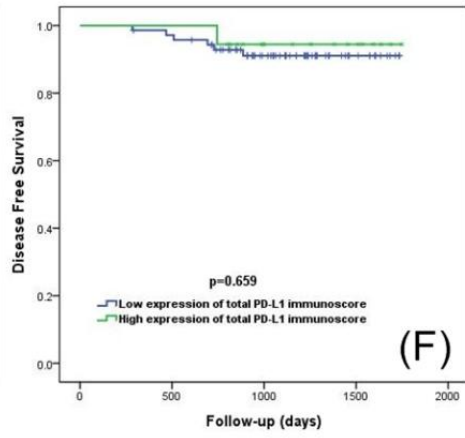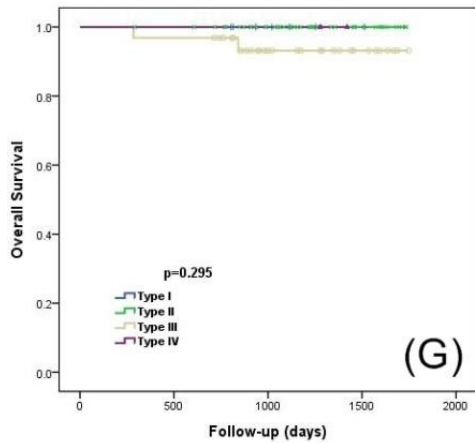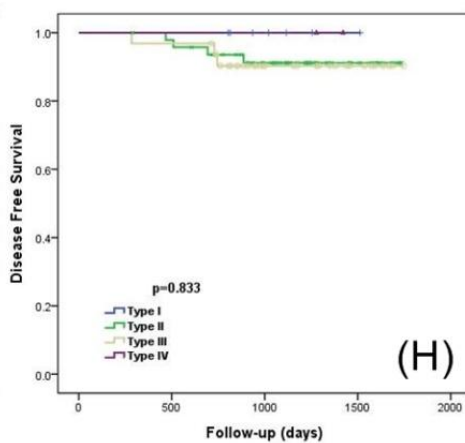

Supplement: 41598_2017_11905_MOESM1_ESM.pdf [file 41598_2017_11905_MOESM1_ESM.pdf]
